# Supplementary material
Source: Frontiers journal article supplement (https://www.frontiersin.org/articles/459796)
Supplement: Data_Sheet_1.xlsx [file Data_Sheet_1.xlsx]

## Sheet: noSearch
	Data Sheet (Supplementary Material)		Overview of Studies Selected for Systematic Review
	Feasible Options for Behavior Change towards More Effective Ocean LIteracy: a Systematic Review
	Prof. Dr. Susanne Stoll-Kleemann (corresponding author)
	Author(s)	Year	Title	Journal, Volume, Issue, Pages	DOI
1	Abrahamse, Wokje Steg, Linda Charles, Vlek Rothengatter, Talib	2007	The effect of tailored information, goal setting, and tailored feedback on household energy use, energy-related behaviors, and behavioral antecedents	Journal of Environmental Psychology, 27(4), 265-276	10.1016/j.jenvp.2007.08.002
2	Alcock, Ian White, Mathew P. Taylor, Tim Coldwell, Deborah F. Gribble, Matthew O. Evans, Karl L. Corner, Adam Vardoulakis, Sotiris Fleming, Lora E.	2017	‘Green’ on the ground but not in the air: Pro-environmental attitudes are related to household behaviours but not discretionary air travel	Global Environmental Change, 42, 136-147	10.1016/j.gloenvcha.2016.11.005
3	Amel, Elise L. Manning, Christine M. Scott, Britain A.	2009	Mindfulness and Sustainable Behavior: Pondering Attention and Awareness as Means for Increasing Green Behavior	Ecopsychology, 1(1), 14-25	10.1089/eco.2008.0005
4	Antonetti, Paolo Maklan, Stan	2014	Feelings that make a difference: How guilt and pride convince consumers of the effectiveness of sustainable consumption choices	Journal of Business Ethics, 124(1), 117-134.	10.1007/s10551-013-1841-9
5	Axon, Stephen	2017	Keeping the ball Rolling: Adressing the enablers of, and barriers to, sustainable lifestyle	Journal of Environmental Psychology, 52, 11-25	10.1016/j.jenvp.2017.05.002
6	Bamberg, Sebastian Möser, Guido	2007	Twenty years after Hines, Hungerford, and Tomera: A new meta-analysis of psycho-social determinants of pro-environmental behavior	Journal of Environmental Psychology, 27(1), 14-25	10.1016/j.jenvp.2006.12.002
7	Bandura, Albert	2007	Impeding ecological sustainability through selective moral disengagement	Journal of Innovation and Sustainable Development, 2(1), 8-35	10.1504/IJISD.2007.016056
8	Barr, Stewart Gilg, Andrew	2006	Sustainable lifestyles: Framing environmental action in and around the home	Geoforum, 37(6), 906-920	10.1016/j.geoforum.2006.05.002
9	Barr, Stewart Gilg, Andrew Shaw, Gareth	2011	Helping People Make Better Choices': Exploring the behaviour change agenda for environmental sustainability	Applied Geography, 31(2), 712-720	10.1016/j.apgeog.2010.12.003
10	Barreto, Mary, L. Szóstek, Agnieszka Karapanos, Evangelos Nunes, Nuno J. Pereira, Lucas Quintal, Filipe	2014	Understanding families’ motivations for sustainable behaviors	Computers in Human Behavior, 40, 6-15	10.1016/j.chb.2014.07.042
11	Barth, Markus Jugert, Philipp Fritsche, Immo	2016	Still underdetected - Social norms and collective efficacy predict the acceptance of electric vehicles in Germany	Transportation research part F: traffic psychology and behaviour, 37, 64-77	10.1016/j.trf.2015.11.011
12	Berenguer, Jaime	2007	The Effect of Empathy in Proenvironmental Attitudes and Behaviors	Environment and Behavior 39(2), 269-283	10.1177/0013916506292937
13	Billé, Raphaël Kelly, Ryan Biastoch, Arne Harrould-Kolieb, Ellycia Herr, Dorothée Joos, Fortunat Kroeker, Kristy Laffoley, Dan Oschlies, Andreas Gattuso, Jean-Pierre	2013	Taking Action Against Ocean Acidification: A Review of Management and Policy Options	Environmental management, 52(4), 761-779	10.1007/s00267-013-0132-7
14	Bolderdijk, Jan Willem Gorsira, Madelijne Keizer, Kees Steg, Linda	2013	Values determine the (in)effectiveness of informational interventions in promoting pro-environmental behavior	PloS one, 8(12), e83911	10.1371/journal.pone.0083911
15	Brand, Ulrich Wissen, Markus	2018	What Kind of Great Transformation? The Imperial Model of Living as a Major Obstacle to Sustainability Politics	GAIA-Ecological Perspectives for Science and Society, 27(3), 287-292	10.14512/gaia.27.3.8
16	Brown, Kirk Warren Kasser, Tim	2005	Are psychological and ecological well-being compatible?	Social Indicators Research, 74(2), 349-368	10.1007/s11205-004-8207-8
17	Chen, Chung-Ling Tsai, Chen-Hao	2015	The role of values, mindfulness, and lifestyle. Soc. Indic. Res. 74, 349–368.	Environmental Education Research	10.1080/13504622.2015.1054266
18	Clayton, Susan Devine-Wright, Patrick Swim, Janet Bonnes, Mirilia Steg, Linda Whitmarsh, Lorraine Carrico, Amanda	2015	Expanding the Role for Psychology in Addressing Environmental Challenges	American Psychologist, 71(3), 199	10.1037/a0039482
19	Clayton, Susan	2018	The Role of Perceived Justice, Political Ideology, and Individual or Collective Framing in Support for Environmental Policies	Social Justice Reseach	10.1007/s11211-018-0303-z
20	Cooke, Anna Fielding, Kelly S. Louis, Winnifred R.	2016	Environmentally active people: the role of autonomy, relatedness, competence and self-determined motivation	Environmental Education Research, 22(5), 631-657	10.1080/13504622.2015.1054262
21	Defila, Rico Di Giulio, Antonietta Kaufmann-Hayoz, Ruth	2014	Sustainable consumption. An unwieldy object of resarch	GAIA-Ecological Perspectives for Science and Society, 23(3), 148-157	10.14512/gaia.23.S1.2
22	De Smet, Andries Peeters, Wouter Sterckx, Sigrid	2016	The delegated authority model misused as a strategy of disengagement in the case of climate change	Ethics & Global Politics, 9(1), 29299	10.3402/egp.v9.29299
23	Dietz, Thomas Gardner, Gerald T. Gilligan, Jonathan Stern, Paul C. Vandenbergh, Michael P.	2009	Household actions can provide a behavioral wedge to rapidly reduce US carbon emissions	Proceedings of the National Academy of Sciences, 106(44), 18452-18456	10.1073/pnas.0908738106
24	Edvardsson Björnberg, Karin Karlsson, Mikael Gilek, Michael Hansson, Sven Ove	2017	Climate and environmental science denial: A review of the scientific literature	Journal of Cleaner Production, 167, 229-241	10.1016/j.jclepro.2017.08.066
25	Ericson, Torgeir Kjønstad, Bjørn Gunaketu Barstad, Anders	2014	Mindfulness and sustainability	Ecological Economics, 104, 73-79	10.1016/j.ecolecon.2014.04.007
26	Evans, Laurel Maio, Gregory R. Corner, Adam Hodgetts, Carl J. Ahmed, Sameera Hahn, Ulrike	2012	Self-interest and pro-environmental behavior	Nature Climate Change, 3(2), 122	10.1038/nclimate1662
27	Farrow, Katherine Grolleau, Gilles Ibanez, Lisette	2017	Social Norms and Pro-environmental Behavior: A Review of the Evidence	Ecological Economics, 140, 1-13	10.1016/j.ecolecon.2017.04.017
28	Fauville, Géraldine Strang, Craig Cannady, Matthew A. Chen, Ying-Fang	2018	Development of the International Ocean Literacy Survey: Measuring Knowledge Across the World	Environmental Education Research, 1-26	10.1080/13504622.2018.1440381
29	Fielding, Kelly S. Hornsey, Matthew J.	2016	A Social Identity Analysis of Climate Change and Environmental Attitudes and Behaviors	Frontiers in Psychology, 7, 121	10.3389/fpsyg.2016.00121
30	Fischer, Daniel Matthias, Barth	2014	Key Competencies for and beyond Sustainable Consumption: An Educational Contribution to the Debate	GAIA-Ecological Perspectives for Science and Society, 23(3), 193-200	10.14512/gaia.23.S1.7
31	Fletcher, Stephen Potts, Jonathan	2007	Ocean citizenship: an emergent geographical concept	Coastal management, 35(4), 511-524	10.1080/08920750701525818
32	Gatersleben, Brigitta Murtagh, Niamh Abrahamse, Wokje	2012	Values, identity and proenvironmental behavior	Contemporary Social Science, 9(4), 374-392	10.1080/21582041.2012.682086
33	Gattuso, Jean-Pierre Magnan, Alexandre K. Bopp, Laurent Cheung, William W. L. Duarte, Carlos M. Hinkel, Jochen Mcleod, Elizabeth Micheli, Fiorenza Oschlies, Andreas Williamson, Phillip Billé, Raphaël Chalastani, Vasiliki I. Gates, Ruth D. Irisson, Jean-Olivier Middelburg, Jack J. Pörtner, Hans-Otto Rau, Greg H.	2018	Ocean Solutions to Address Climate Change and Its Effects on Marine Ecosystems	Frontiers in Marine Scienc, 5, 337	10.3389/fmars.2018.00337
34	Gelchin, Stefan Buckley, Paul Pinnegar, John K. Chilvers, Jason Lorenzoni, Irene Terry, Geraldine Guerrero Matias Castilla, Juan Carlos Valdebenito, Abel Duarte, Carlos M.	2014	Public awareness, concerns, and priorities about anthropogenic impacts on marine environments	Proceedings of the National Academy of Sciences 111(42), 15042-15047	10.1073/pnas.1417344111
35	Gifford, Robert Nilsson, Andreas	2014	Personal and social factors that influence pro-environmental concern and behaviour: A review	International Journal of Psychology, 49(3), 141-157	10.1002/ijop.12034
36	Girod, Bastien van Vuuren, Detlef Peter Hertwich, Edgar G.	2014	Climate policy through changing consumption choices: Options and obstacles for reducing greenhouse gas emissions	Global Environmental Change, 25, 5-15	10.1016/j.gloenvcha.2014.01.004
37	Gissi, Elena Portman, Michelle E. Hornidge, Anna-Katharina	2018	Un-Gendering the Ocean: Why Women Matter in Ocean Governance for Sustainability	Marine Policy, 94, 215-219	10.1016/j.marpol.2018.05.020
38	Griskevicius, Vlades Tybor, Joshua M. Van den Bergh, Bram	2010	Going green to be seen: Status, reputation, and conspicuous conservation	Journal of Personality and Social Psychology, 98(3), 392	10.1037/a0017346
39	Guest, Haley Lotze, Heike K. Wallace, Douglas	2015	Youth and the sea: Ocean literacy in Nova Scotia, Canada	Marine Policy, 58, 98-107	10.1016/j.marpol.2015.04.007
40	Han, Heesup Hwang, Jinsoo Lee, Myong Jae	2016	The value-belief-emotion-norm model: investigating customers` eco-friendly behavior	Journal of Travel & Tourism Marketing, 34(5), 590-607	10.1080/10548408.2016.1208790
41	Heimlich, Joe E. Ardoin, Nicole M.	2008	Understanding behavior to understanding behavior change: a literature review	Environmental Education Research, 14(3), 215-237	10.1080/13504620802148881
42	Heiskanen, Eva Johnson, Mikael Robinson, Simon Vadovics, Edina Saastamoinen, Mika	2010	Low-carbon communities as a context for individual behavioural change	Energy Policy, 38(12), 7586-7595	10.1016/j.enpol.2009.07.002
43	Higgs, Suzanne	2015	Social norms and their influence on eating behaviours	Appetite, 86, 38-44	10.1016/j.appet.2014.10.021
44	Hirsh, Jacob B.	2010	Personality and environmental concern	Journal of Environmental Psychology, 30(2), 245-248	10.1016/j.jenvp.2010.01.004
45	Howell, Rachel A.	2013	It's not (just) "the environment, stupid!" Values, motivations, and routes to engagement of people adopting lower-carbon lifestyles	Global Environmental Change, 23(1), 281-290	10.1016/j.gloenvcha.2012.10.015
46	Hynes, Stephen Norton, Danny Corless, Rebecca	2014	Investigating societal attitudes towards the marine environment of Ireland	Marine Policy, 47, 57-65	10.1016/j.marpol.2014.02.002
47	Jugert, Philipp Greenaway, Katherine H. Barth, Markus Büchner, Ronja Eisentraut, Sarah Fritsche, Immo	2016	Collective efficacy increases pro-environmental intentions through increasing self-efficacy	Journal of Environmental Psychology, 48, 12-23	10.1016/j.jenvp.2016.08.003
48	Jefferson, Rebecca McKinley, Emma Capstick, Stuart Fletcher, Stephen Griffin, Holly Milanese, Martina	2015	Understanding audiences: Making public perceptions research matter to marine conservation	Ocean & Coastal Management, 115, 61-70	10.1016/j.ocecoaman.2015.06.014
49	Kaiser, Florian G. Byrka, Katarzyna	2010	Environmentalism as a trait: Gauging people`s prosocial personality in terms of environmental engagement	International Journal of Psychology, 46(1), 71-79	10.1080/00207594.2010.516830
50	Klein, Sina A. Heck, Daniel W. Reese Gerhard Hilbig, Benjamin E.	2019	On the relationship between Openness to Experience, political orientation, and pro-environmental behavior	Personality and Individual Differences, 138, 344-348	10.1016/j.paid.2018.10.017
51	Kollmuss, Anja Agyeman, Julian	2002	Mind the Gap: Why do people act environmentally and what are the barriers to proenvironmental behavior	Environmental education research, 8(3), 239-260	10.1080/13504620220145401
52	Kopke, Kathrin Black, Jeffrey Dozier, Amy	2019	Stepping Out of the Ivory Tower for Ocean Literacy	Frontiers in Marine Science, 6, 60	10.3389/fmars.2019.00060
53	Lacroix, Karine Gifford, Robert	2017	Psychological Barriers to Energy Conservation Behaviors: The Role of Worldviews and Climate Change Risk Perception	Environment and Behavior, 50(7), 749-780	10.1177/0013916517715296
54	Leiserowitz, Anthony A. Kates, Robert W. Parris, Thomas M	2005	Do Global Attitudes and Behaviors Support Sustainable Development?	Environment: Science and Policy for Sustainable Development, 47(9), 22-38	10.3200/ENVT.47.9.22-38
55	Lindenberg, Siegwart Steg, Linda	2007	Normative, Gain and Hedonic Goal Frames Guiding Environmental Behavior	Journal of Social issues, 63(1), 117-137	10.1111/j.1540-4560.2007.00499
56	Lotze, Heike K. Guest, Haley O'Leary, Jennifer Tuda, Arthur Wallace, Douglas	2018	Public perceptions of marine threats and protection from around the world	Ocean & coastal management, 152, 14-22	10.1016/j.ocecoaman.2017.11.004
57	Lubchenco, Jane Cerny-Chipman, Elizabeth B. Reimer, Jessica N. Levin, Simon A.	2016	The right incentives enable ocean sustainability successes and provide hope for the future	Proceedings of the National Academy of Sciences, 113(51), 14507-14514	10.1073/pnas.1604982113
58	Magnier, Lisa Mugge, Ruth Schoormans, Jan	2018	Turning ocean garbage into products – Consumers’ evaluations of products made	Journal of Cleaner Production, 215, 84-98	10.1016/j.jclepro.2018.12.246
59	Markowitz, Ezra M. Shariff, Azim F.	2012	Climate Change and Moral Judgement	Nature Climate Change, 2(4), 243-247	10.1038/NCLIMATE1378
60	Masson, Thorsten, Fritsche, Immo	2014	Adherence to climate change-related ingroup norms: Do dimensions of group identification matter?	European Journal of Social Psychology, 44(5), 455-465	10.1002/ejsp.2036
61	McCauley, Veronica Mchugh, Patricia Davison, Kevin Domegan, Christine	2019	Collective Intelligence for Advancing Ocean Literacy	Environmental Education Research	10.1080/13504622.2018.1553234
62	McKenzie-Mohr, Doug	2000	Promoting sustainable behavior: An introduction to community-based social marketing	Journal of Social Issues, 56(3), 543-554	10.1111/0022-4537.00183
63	McKinley, Emma Fletcher, Stephen	2010	Individual responsibility for the oceans? An evaluation of marine citizenship by UK marine practitioners	Ocean & Coastal Management, 53(7), 379-384	10.1016/j.ocecoaman.2010.04.012
64	McKinley, Emma Fletcher, Stephen	2012	Improving marine environmental health through marine citizenship: A call for debate	Marine Policy, 36(3), 839-843	10.1016/j.marpol.2011.11.001
65	Milfont, Taciano L. Sibley, Chris G.	2012	The big five personality traits and environmental engagement: Associations at the individual & societal level	Journal of Environmental Psychology, 32(2), 187-195	10.1016/j.jenvp.2011.12.006
66	Murtagh, Niamh Gatersleben, Birgitta Uzzell, David	2013	Self-identity Threat and Resistance to Change: Evidence from Regular Travel Behavior	Journal of Environmental Psychology, 32(4), 318-326	10.1016/j.jenvp.2012.05.008
67	Naderi, Iman Van Steenburg, Eric	2018	Me first, then the environment: Young Millenials as green consumers	Young Consumers, 19(3), 280-295	10.1108/YC-08-2017-00722
68	Noppers, Ernst H. Keizer, Kees Bolderdijk, Jan Willem Steg, Linda	2014	The adoption of sustainable innovations: Driven by symbolic and environmental motives	Global Environmental Change, 25, 52-62	10.1016/j.gloenvcha.2014.01.012
69	O`Brien, Catherine	2008	Sustainable Happiness: How Happiness Studies Can Contribute to a More Sustainable Future	Canadian Psychology/Psychologie canadienne, 49(4), 289	10.2139/ssrn.2119614
70	O'Riordan, Tim Stoll-Kleemann, Susanne	2015	The challenges of seeking to change dietary behavior towards more sustainable consumption of livestock products	Science and Policy for Sustainable Development, 57(5), 4-13	10.1080/00139157.2015.1069093
71	Ortega Egea, José Manuel de Frutos, Nieves García	2013	Toward Consumption Reduction: An Environmentally Motivated Perspective	Psychology & Marketing, 30(8), 660-675	10.1002/mar.20636
72	Osbaldiston, Richard Schott, John Paul	2012	Environmental sustainability & behavioral science: Meta-analysis of proenvironmental behavior experiments	Environment and Behavior, 44(2), 257-299	10.1177/0013916511402673
73	Ostrom, Elinor	2009	A General Framework for Analyzing Sustainability of Social-Ecological Systems	Science, 325(5939), 419-422	10.1126/science.1172133
74	Otto, Siegmar Neaman, Alexander Richards, Bárbara Marió, Andrés	2015	Explaining the Ambiguous Relations Between Income, environmental Knowledge, and Environmentally Significant Behavior	Society & Natural Resources, 29(5), 628-632	10.1080/08941920.2015.1037410
75	Pearson, Elissa Mellish, Sarah Sanders, Ben Litchfield, Carla	2014	Marine wildlife entanglement: Assessing knowledge, attitutes, and relevant behaviour in the Australian community	Marine pollution bulletin, 89(1-2), 136-148	10.1016/j.marpolbul.2014.10.014
76	Peattie, Ken	2010	Green consumption: behavior and norms	Annual review of environment and resources, 35, 195-228	10.1146/annurev-environ-032609-094328
77	Poortinga, Wouter Withmarsh, Lorraine Steg, Linda Böhm, Gisela Fisher, Stephen	2019	Climate change perceptions and their individual-level determinants: A cross-European analysis	Global Environmental Change, 55, 25-35	10.1016/j.gloenvcha.2019.01.007
78	Potts, Tavis Pita, Cristina O'Higgins Tim Mee, Laurence	2016	Who cares? European attitudes towards marine and coastal environments	Marine Policy, 72, 59-66	10.1016/j.marpol.2016.06.012
79	Redman, Erin Redman, Aaron	2014	Transforming sustainable food and waste behaviors by realigning domains of knowledge in our education system	Journal of Cleaner Production, 64, 147-157	10.1016/j.jclepro.2013.09.016
80	Reese, Gerhard Jacob, Lisa	2015	Principles of environmental justice and pro-environmental action: A two-step process model of moral anger and responsibility to act	Environmental Science & Policy, 51, 88-94	10.1016/j.envsci.2015.03.011
81	Reese, Gerhard Junge, Eva A.	2017	Keep on Rockin’ in a (Plastic-)Free World: Collective Efficacy and Pro-Environmental Intentions as a Function of Task Difficulty	Sustainability, 9(2), 200	10.3390/su9020200
82	Reid, Louis Sutton, Philip Hunter, Colin	2010	Theorizing the meso level: the household as a crucible of pro-environmental behaviour	Progress in human geography, 34(3), 309-327	10.1177/0309132509346994
83	Revell, Kristy	2013	Promoting sustainability and pro-environmental behaviour through local government programmes: examples from London, UK	Journal of Integrative Environmental Sciences, 10(3-4), 199-218	10.1080/1943815X.2013.858752
84	Southerton, Dale	2013	Habits, routines and temporalities of consumption: From individual behaviours to the reproduction of everyday practices	Time & Society, 22(3), 335-355	10.1177/0961463X12464228
85	Steel, Brent S. Smith, Court Opsommer, Laura Curiel, Sara Warner-Steel, Ryan	2005	Public ocean literacy in the United States	Ocean & Coastal Management, 48, 97-114	10.1016/j.ocecoaman.2005.01.002
86	Steg, Linda Bolderdijk, Jan Willem Keizer, Kees Perlaviciute, Goda	2014	An integrated framework for encouraging pro-environmental behavior: The role of values, situational factors and goals	Journal of Environmental psychology, 38, 104-115	10.1016/j.jenvp.2014.01.002
87	Stern, Paul C.	2000	Toward a Coherent Theory of Environmentally Significant Behavior	Journal of Social Issues, 56(2), 407-427	10.1111/0022-4537.00175
88	Stoll-Kleemann, Susanne O'Riordan, Tim Jaeger, Carlo C.	2001	The psychology of denial concerning climate mitigation measures: evidence from Swiss focus groups	Global environmental change, 11(2), 107-117	10.1016/S0959-3780(00)00061-3
89	Stoll-Kleemann, Susanne Schmidt, Uta Johanna	2017	Reducing meat consumption to counter biodiversity loss and food insecurity: a review of influence factors	Regional Environmental Change, 17(5), 1261-1277	10.1007/s10113-016-1057-5
90	Thørgersen, John	2004	A cognitive dissonance interpretation of consistencies and inconsistencies in environmentally responsible behavior	Journal of Environmental Psychology, 24(1), 93-103	10.1016/S0272-4944(03)00039-2
91	Thørgersen, John	2014	Unsustainable consumption. Basic causes and implications for policy	European Psychologist, 19, 84-95	10.1027/1016-9040/a000176
92	Tobler, Christina Visschers, Vivianne H. M. Siegrist, Michael	2011	Eating green. Consumers' willingness to adopt ecological food consumption behaviors	Appetite, 57(3), 674-682	10.1016/j.appet.2011.08.010
93	Truelove, Heather Barnes Carrico, Amanda Weber, Elke U. Raimi, Kaitlin Toner Vandenbergh, Michael P.	2014	Positive and negative spillover of pro-environmental behavior: An integrative review and theoretical framework	Global Environmental Change, 29, 127-138	10.1016/j.gloenvcha.2014.09.004
94	Van de Vyver, Julie Abrams, Dominic Hopthrow, Tim Purewal, Kiran de Moura, Georgina Randsleyde Meleady, Rose	2018	Motivating the selfish to stop idling: Self-interest cues can improve environmentally relevant driver behaviour	Transportation Research Part F: Traffic Psychology and Behaviour, 54, 79-85	10.1016/j.trf.2018.01.015
95	Vartanian, Lenny R.	2015	Impression management and food intake. Current directions in research	Appetite, 86, 74-80	10.1016/j.appet.2014.08.021
96	Verbeke, Wim	2008	Impact of communication on consumers' food choice	Proceedings of the Nutrition Society, 67(3), 281-288	10.1017/S0029665108007179
97	Verplanken, Bas Roy, Deborah	2016	Empowering interventions to promote sustainable lifestyles: Testing the habit discontinuity hypothesis	Journal of Environmental Psychology, 45, 127-134	10.1016/j.jenvp.2015.11.008
98	Vincent, Amanda C. J.	2011	Saving the shallows: focusing marine conservation where people might care	Aquatic Conservation: Marine and Freshwater Ecosystems, 21(6), 495-499	10.1002/aqc.1226
99	Voyer, Michelle Gollan, Natalie Barclay, Kate Gladstone, William	2015	It’s part of me'; understanding the values, images and principles of coastal users and their influence on the social acceptability of MPAs	Marine Policy, 52, 93-102	10.1016/j.marpol.2014.10.027
100	Whitmarsch, Lorraine O'Neil, Saffron	2010	Green identity, green living? The role of pro-environmental self-identity in determining consistency across diverse pro-environmental behaviours	Journal of Environmental Psychology, 30(3), 305-314	10.1016/j.jenvp.2010.01.003
101	Wright, Andrew J. Veríssimo, Diogo Pilfold, Kathleen Parsons, E.C.M. Ventre, Kimberly Cousins, Jenny Jefferson, Rebecca Koldewey, Heather Llewellyn, Fiona McKinley, Emma	2015	Competitive outreach in the 21st century: Why we need conservation marketing	Ocean & Coastal Management, 115, 41-48	10.1016/j.ocecoaman.2015.06.029
102	Wynes, Seth Nicholas, Kimberly A.	2017	The climate mitigation gap: education and government recommendations miss the most effective individual actions	Environmental Research Letters, 12(7), 074024	10.1088/1748-9326/aa7541
